# Supplementary material
Source: PubMed Central journal article supplement (PMC2939758)

### Supplemental Figures

#### Supplemental Figure 1. Specificity of Amphiregulin ELISA

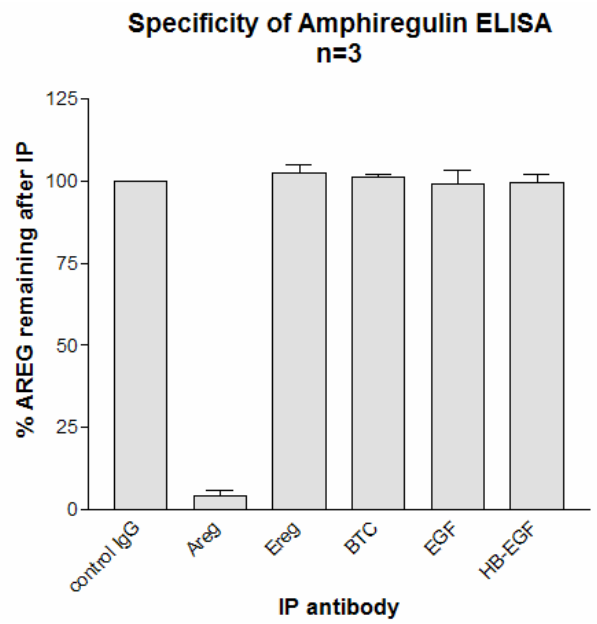

#### Supplemental Figure 2. Levels of AREG in follicles yielding normal oocytes or oocytes with compromised developmental potential with conventional IVF.

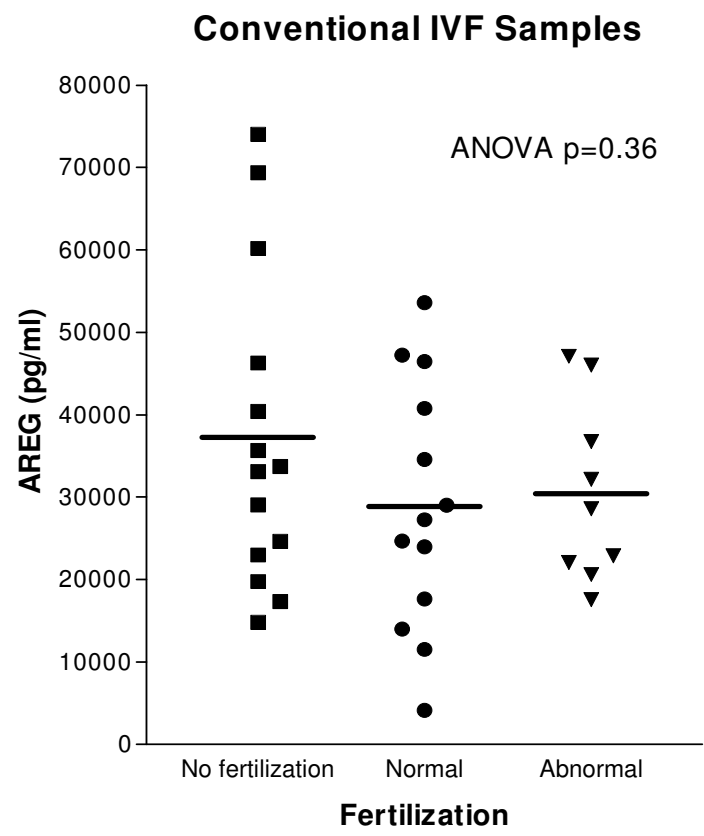

**Supplemental Figure 3. Correlation of Female Age and Follicular Amphiregulin**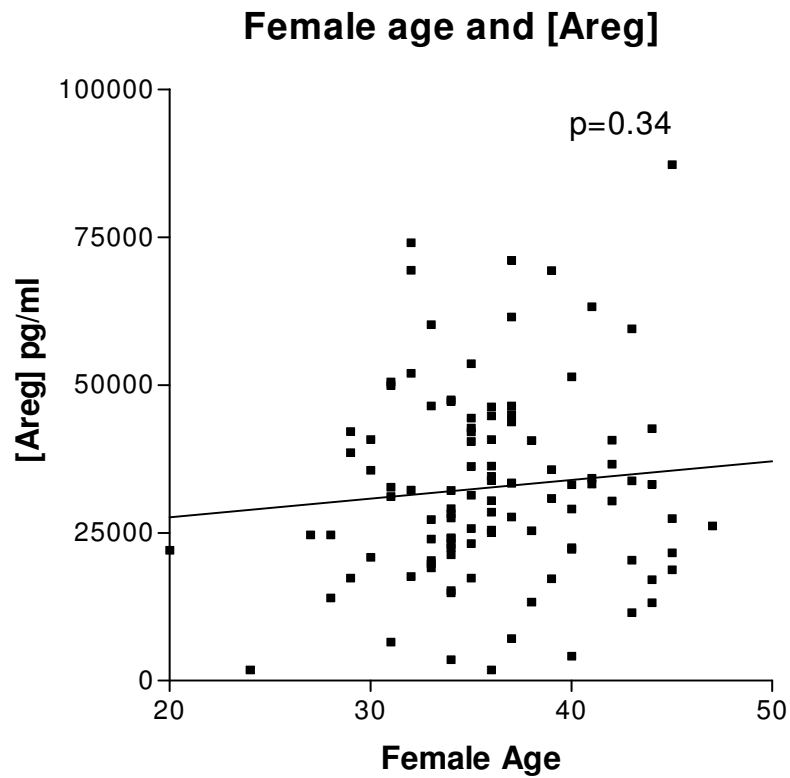**Supplemental Figure 4. Correlation of Follicular Volume and Follicular Amphiregulin**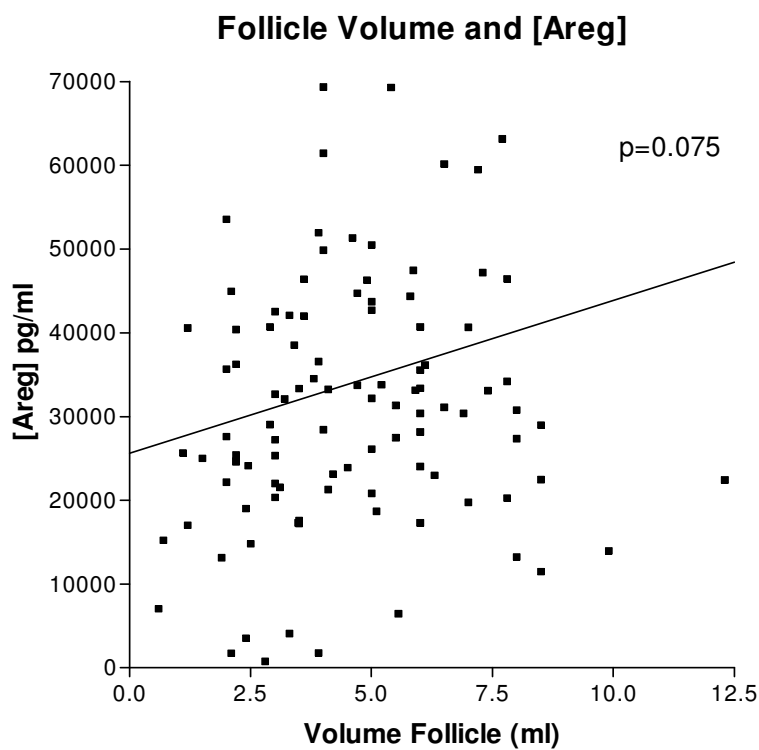

Supplement: supp_deq212_deq212supp.pdf [file supp_deq212_deq212supp.pdf]
